# Supplementary material for: SAGA Complex Components and Acetate Repression inAspergillus nidulans
Source: Oxford University Press journal article supplement (doi:10.1534/g3.112.003913), 2012-11-01
Supplement: 1357_figures1.pdf [file 1357_figures1.pdf]

**Figure S1** The top panel shows the AcdX amino acid sequence aligned to Spt8, showing 28.4% identity. *acdX1* truncates after **D** indicated at amino acid 609, and *acdX2* truncates after **K** indicated at amino acid 400. The bottom panel shows SptC aligned to Spt3, showing 47.0% identity. Sequences were aligned using the MUSCLE alignment tool via Geneious Pro 4.7.5.
